# Supplementary material for: Bis(phosphanylamino)benzene ligands: a zinc(ii) complex and an unusual nickel(i) complex with a Dewar-benzene-type Ni2P2N2 backbone
Source: Royal Society of Chemistry journal article supplement (doi:10.1039/b720004h), 2008-01-01
Supplement: b720004h.pdf [file b720004h.pdf]

Interaction diagram of two NiL fragments in  $\text{Ni}_2\text{L}_2$  (model for compound **4**)

Calculation have been done at the BP DFT level by using DZ basis set from

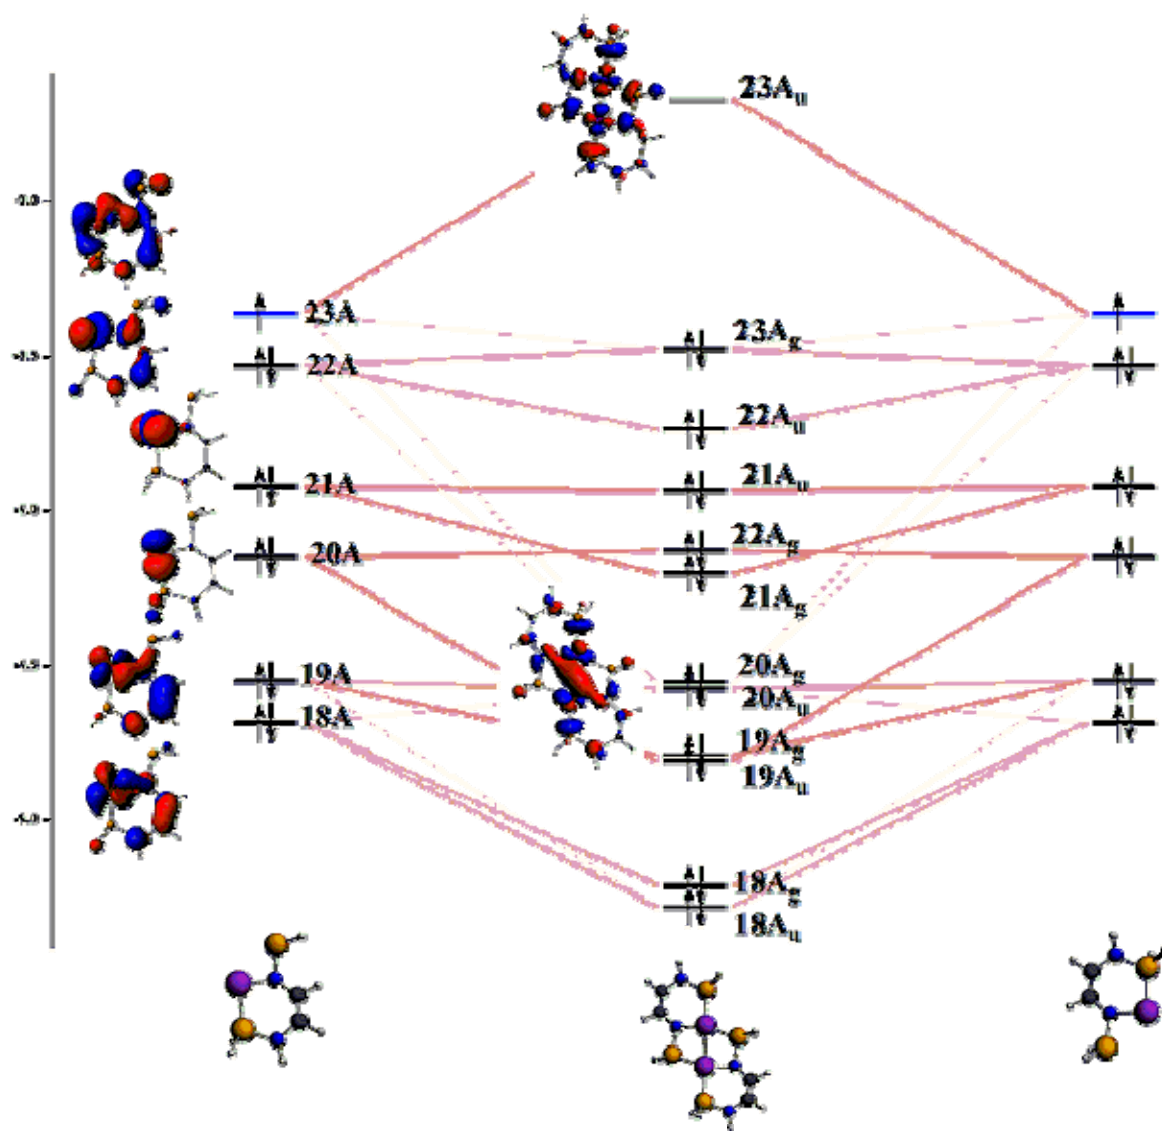

ADF2007.01

NiL Fragment 1

$\text{Ni}_2\text{L}_2$

NiL Fragment 2
